# Supplementary material for: Variations in the Major Nutrient Composition of Dominant High-Yield Varieties (HYVs) in Parboiled and Polished Rice of Bangladesh
Source: MDPI journal article supplement (doi:10.3390/foods12213997), 2023-11-01
Supplement: s1 [file s1]

Supplementary Table S1: Microwave digestion program

| Step | Time (Min) | Power     | Temperature (°C) |
|------|------------|-----------|------------------|
| 1    | 15         | 1800W     | Ramp to 200      |
| 2    | 15         | 1800W     | Hold at 200      |
| 3    | 5          | Cool down |                  |

Supplementary Table S2: Instrument configuration and ICP parameters

| Parameter                  | Settings        |
|----------------------------|-----------------|
| Torch                      | Mini Torch      |
| Nebulizer                  | Concentric Type |
| Chamber                    | Cyclonic Type   |
| Peristaltic Pump           | Inside          |
| Radio Frequency Power (kW) | 1.20            |
| Plasma Gas (L/min)         | 10.0            |
| Auxiliary Gas (L/min)      | 0.60            |
| Carrier Gas (L/min)        | 0.60            |
| View Direction             | Axial/Radial    |
| Exposure time (s)          | 15              |

Supplementary Table S3: Rice varieties with their production yield

| Rice varieties                        |             | Season of cultivation and harvesting                      | Yield (ton ha <sup>-1</sup> ) | Standard yield (ton ha <sup>-1</sup> ) |
|---------------------------------------|-------------|-----------------------------------------------------------|-------------------------------|----------------------------------------|
| Boro varieties                        | BRRI dhan28 | Planted in November-December and harvested in March-April | 7.01                          | 6.0                                    |
|                                       | BRRI dhan29 |                                                           | 7.35                          | 7.5                                    |
|                                       | BRRI dhan84 |                                                           | 6.10                          | 6.5                                    |
| Transplanted Aman (T. Aman) varieties | BR11        | Planted in March-April and harvested in November-December | 4.52                          | 5.0                                    |
|                                       | BRRI dhan49 |                                                           | 4.57                          | 5.5                                    |

Supplementary Table S4: Effects of parboiling and polishing on the proximate composition of different rice varieties in Bangladesh

| Rice varieties         | Energy (Kcal)                 | Moisture (%)                | Protein (%)                 | Fat (%)                    | Ash (%)                    | Available Carbohydrate (%)  | TDF (%)                     |
|------------------------|-------------------------------|-----------------------------|-----------------------------|----------------------------|----------------------------|-----------------------------|-----------------------------|
| <b>BR11</b>            |                               |                             |                             |                            |                            |                             |                             |
| Unparboiled unpolished | 351.458 ± 0.129 <sup>a</sup>  | 11.024 ± 0.002 <sup>c</sup> | 10.521 ± 0.001 <sup>b</sup> | 1.466 ± 0.012 <sup>b</sup> | 1.339 ± 0.013 <sup>b</sup> | 72.440 ± 0.017 <sup>c</sup> | 3.210 ± 0.010 <sup>b</sup>  |
| Unparboiled polished   | 347.415 ± 0.098 <sup>b</sup>  | 11.773 ± 0.008 <sup>b</sup> | 8.930 ± 0.029 <sup>d</sup>  | 0.406 ± 0.006 <sup>c</sup> | 0.405 ± 0.004 <sup>d</sup> | 75.535 ± 0.075 <sup>a</sup> | 2.950 ± 0.038 <sup>d</sup>  |
| Parboiled unpolished   | 344.902 ± 0.014 <sup>d</sup>  | 12.394 ± 0.005 <sup>a</sup> | 10.724 ± 0.021 <sup>a</sup> | 1.506 ± 0.005 <sup>a</sup> | 1.408 ± 0.004 <sup>a</sup> | 70.259 ± 0.027 <sup>d</sup> | 3.710 ± 0.006 <sup>a</sup>  |
| Parboiled polished     | 346.110 ± 0.057 <sup>c</sup>  | 11.782 ± 0.010 <sup>b</sup> | 9.764 ± 0.040 <sup>c</sup>  | 0.305 ± 0.005 <sup>d</sup> | 0.543 ± 0.012 <sup>c</sup> | 74.550 ± 0.081 <sup>b</sup> | 3.057 ± 0.043 <sup>c</sup>  |
| <b>BRRI dhan28</b>     |                               |                             |                             |                            |                            |                             |                             |
| Unparboiled unpolished | 356.731 ± 0.779 <sup>a</sup>  | 10.056 ± 0.143 <sup>c</sup> | 8.327 ± 0.028 <sup>b</sup>  | 1.573 ± 0.009 <sup>b</sup> | 1.220 ± 0.152 <sup>a</sup> | 75.841 ± 0.149 <sup>b</sup> | 2.983 ± 0.011 <sup>c</sup>  |
| Unparboiled polished   | 342.219 ± 0.215 <sup>d</sup>  | 12.902 ± 0.002 <sup>a</sup> | 6.960 ± 0.010 <sup>d</sup>  | 0.644 ± 0.028 <sup>d</sup> | 0.590 ± 0.005 <sup>b</sup> | 75.386 ± 0.051 <sup>c</sup> | 3.518 ± 0.057 <sup>b</sup>  |
| Parboiled unpolished   | 352.041 ± 0.168 <sup>b</sup>  | 10.906 ± 0.006 <sup>b</sup> | 8.545 ± 0.021 <sup>a</sup>  | 1.695 ± 0.004 <sup>a</sup> | 1.244 ± 0.334 <sup>a</sup> | 73.691 ± 0.074 <sup>d</sup> | 3.919 ± 0.015 <sup>a</sup>  |
| Parboiled polished     | 349.816 ± 0.385 <sup>c</sup>  | 10.901 ± 0.066 <sup>b</sup> | 7.030 ± 0.026 <sup>c</sup>  | 0.692 ± 0.002 <sup>c</sup> | 0.717 ± 0.013 <sup>b</sup> | 77.074 ± 0.257 <sup>a</sup> | 3.586 ± 0.295 <sup>ab</sup> |
| <b>BRRI dhan29</b>     |                               |                             |                             |                            |                            |                             |                             |
| Unparboiled unpolished | 353.992 ± 0.037 <sup>a</sup>  | 10.263 ± 0.007 <sup>d</sup> | 8.913 ± 0.011 <sup>b</sup>  | 1.271 ± 0.010 <sup>b</sup> | 1.315 ± 0.010 <sup>b</sup> | 75.212 ± 0.024 <sup>c</sup> | 3.025 ± 0.005 <sup>c</sup>  |
| Unparboiled polished   | 349.612 ± 0.077 <sup>b</sup>  | 10.907 ± 0.017 <sup>c</sup> | 8.656 ± 0.047 <sup>c</sup>  | 0.395 ± 0.008 <sup>c</sup> | 0.622 ± 0.009 <sup>d</sup> | 76.295 ± 0.031 <sup>a</sup> | 3.125 ± 0.024 <sup>b</sup>  |
| Parboiled unpolished   | 349.772 ± 0.276 <sup>b</sup>  | 11.350 ± 0.001 <sup>b</sup> | 9.241 ± 0.033 <sup>a</sup>  | 1.537 ± 0.031 <sup>a</sup> | 1.354 ± 0.014 <sup>a</sup> | 72.969 ± 0.026 <sup>d</sup> | 3.548 ± 0.034 <sup>a</sup>  |
| Parboiled polished     | 344.273 ± 0.183 <sup>c</sup>  | 12.229 ± 0.023 <sup>a</sup> | 8.323 ± 0.024 <sup>d</sup>  | 0.309 ± 0.003 <sup>d</sup> | 0.715 ± 0.006 <sup>c</sup> | 75.673 ± 0.041 <sup>b</sup> | 2.750 ± 0.044 <sup>d</sup>  |
| <b>BRRI dhan49</b>     |                               |                             |                             |                            |                            |                             |                             |
| Unparboiled unpolished | 351.357 ± 0.106 <sup>a</sup>  | 11.026 ± 0.010 <sup>a</sup> | 10.532 ± 0.010 <sup>b</sup> | 1.463 ± 0.011 <sup>b</sup> | 1.351 ± 0.022 <sup>b</sup> | 72.402 ± 0.023 <sup>c</sup> | 3.227 ± 0.030 <sup>b</sup>  |
| Unparboiled polished   | 348.860 ± 2.298 <sup>ab</sup> | 11.355 ± 0.544 <sup>a</sup> | 8.934 ± 0.028 <sup>d</sup>  | 0.406 ± 0.002 <sup>c</sup> | 0.457 ± 0.043 <sup>d</sup> | 75.886 ± 0.601 <sup>a</sup> | 2.962 ± 0.049 <sup>c</sup>  |
| Parboiled unpolished   | 347.186 ± 0.189 <sup>b</sup>  | 11.736 ± 0.010 <sup>a</sup> | 10.736 ± 0.034 <sup>a</sup> | 1.501 ± 0.001 <sup>a</sup> | 1.481 ± 0.064 <sup>a</sup> | 70.822 ± 0.048 <sup>d</sup> | 3.724 ± 0.034 <sup>a</sup>  |
| Parboiled polished     | 347.329 ± 0.739 <sup>b</sup>  | 11.430 ± 0.359 <sup>a</sup> | 9.717 ± 0.015 <sup>c</sup>  | 0.379 ± 0.002 <sup>d</sup> | 0.703 ± 0.002 <sup>c</sup> | 74.755 ± 0.177 <sup>b</sup> | 3.017 ± 0.017 <sup>c</sup>  |
| <b>BRRI dhan84</b>     |                               |                             |                             |                            |                            |                             |                             |
| Unparboiled unpolished | 353.052 ± 0.197 <sup>b</sup>  | 10.273 ± 0.017 <sup>c</sup> | 9.238 ± 0.031 <sup>b</sup>  | 1.035 ± 0.010 <sup>b</sup> | 1.333 ± 0.061 <sup>a</sup> | 75.269 ± 0.058 <sup>b</sup> | 2.852 ± 0.047 <sup>a</sup>  |
| Unparboiled polished   | 351.254 ± 0.307 <sup>c</sup>  | 10.694 ± 0.061 <sup>b</sup> | 8.004 ± 0.003 <sup>c</sup>  | 0.626 ± 0.005 <sup>c</sup> | 0.659 ± 0.009 <sup>b</sup> | 76.783 ± 0.112 <sup>a</sup> | 3.234 ± 0.050 <sup>a</sup>  |
| Parboiled unpolished   | 355.594 ± 1.227 <sup>a</sup>  | 10.674 ± 0.052 <sup>b</sup> | 9.313 ± 0.010 <sup>a</sup>  | 1.775 ± 0.020 <sup>a</sup> | 1.351 ± 0.002 <sup>a</sup> | 74.298 ± 0.600 <sup>c</sup> | 2.589 ± 0.566 <sup>a</sup>  |
| Parboiled polished     | 350.024 ± 0.236 <sup>c</sup>  | 10.889 ± 0.053 <sup>a</sup> | 8.028 ± 0.008 <sup>c</sup>  | 0.491 ± 0.001 <sup>d</sup> | 0.708 ± 0.006 <sup>b</sup> | 76.862 ± 0.066 <sup>a</sup> | 3.023 ± 0.001 <sup>a</sup>  |

Values are presented as mean ± standard deviation of triplicate analyses, and values with the same superscript letter within the column do not differ significantly at  $p < 0.05$  by one-way ANOVA

Supplementary Table S5: Percentage of nutrient loss due to the treatment of 10% DOM

| Nutrients    | BR dhan11   |           | BRRi dhan28 |           | BRRi dhan29 |           | BRRi dhan49 |           | BRRi dhan84 |           |
|--------------|-------------|-----------|-------------|-----------|-------------|-----------|-------------|-----------|-------------|-----------|
|              | Unparboiled | Parboiled |
| Protein      | -15.08      | -8.92     | -16.41      | -17.75    | -2.92       | -9.92     | -15.16      | -9.47     | -13.35      | -13.78    |
| Fat          | -72.50      | -79.87    | -59.02      | -59.25    | -68.77      | -79.87    | -71.98      | -74.67    | -39.74      | -72.42    |
| Carbohydrate | 4.27        | 6.10      | -0.61       | 4.59      | 1.44        | 3.70      | 4.82        | 5.55      | 2.01        | 3.45      |
| Fiber        | -8.00       | -17.54    | 17.99       | -8.43     | 3.31        | -22.46    | -8.06       | -18.98    | 13.32       | 16.73     |
| Ash          | -69.83      | -61.70    | -51.91      | -42.51    | -53.03      | -47.29    | -66.26      | -52.58    | -50.87      | -47.41    |
| Thiamin      | -7.02       | -7.29     | -21.23      | -16.96    | -5.92       | -6.86     | -16.39      | -12.94    | -15.19      | -8.73     |
| Riboflavin   | -6.90       | 2.70      | -43.75      | -39.13    | 3.80        | -3.90     | -2.86       | -12.50    | -6.47       | 4.76      |
| Niacin       | -7.29       | -7.05     | -25.42      | -20.91    | -23.07      | -9.65     | -2.27       | -6.23     | -10.64      | -9.72     |
| Pyridoxine   | -13.43      | -23.08    | -20.90      | -37.50    | -47.14      | -52.94    | -15.85      | -2.99     | -22.22      | -18.68    |
| Folate       | -16.70      | -7.63     | -55.53      | -50.03    | -30.25      | -41.25    | -0.39       | -17.58    | -11.45      | -12.18    |
| P            | -61.80      | -48.18    | -2.48       | -1.44     | -1.70       | -1.20     | -0.33       | -0.25     | -3.91       | -4.04     |
| Zn           | -10.31      | -3.96     | -0.44       | -0.52     | -1.08       | -0.42     | 0.36        | 0.59      | -3.27       | -3.53     |
| Ca           | -1.18       | 3.08      | -3.82       | 2.89      | -1.84       | -3.36     | 1.87        | -0.08     | -22.44      | -13.05    |
| Mg           | -22.54      | -21.30    | 0.12        | 1.22      | -4.76       | -5.66     | -0.13       | 0.70      | -14.99      | -13.84    |
| Fe           | -7.37       | 3.43      | -7.30       | -4.92     | -2.81       | -3.37     | -1.10       | -0.59     | -3.61       | -1.40     |
| Na           | 3.09        | -1.70     | -4.07       | -1.35     | 3.69        | -0.24     | -2.45       | 2.00      | 2.68        | 1.40      |
| K            | -1.77       | 0.39      | -1.57       | -2.63     | -0.23       | -0.42     | -1.19       | -1.75     | -0.11       | 0.34      |

Supplementary Table S6: Percentage of nutrient loss due to the treatment of parboiling

| Nutrients    | BR11   |          | BRR1 dhan28 |          | BRR1 dhan29 |          | BRR1 dhan49 |          | BRR1 dhan84 |          |
|--------------|--------|----------|-------------|----------|-------------|----------|-------------|----------|-------------|----------|
|              | Brown  | Polished | Brown       | Polished | Brown       | Polished | Brown       | Polished | Brown       | Polished |
| Protein      | 1.90   | 9.29     | 2.64        | 1.01     | 3.66        | -3.81    | 1.93        | 8.77     | 0.83        | 0.33     |
| Fat          | 2.73   | -24.79   | 7.86        | 7.25     | 21.26       | -21.85   | 2.51        | -7.32    | 70.83       | -21.81   |
| Carbohydrate | -3.01  | -1.31    | -2.83       | 2.24     | -2.98       | -0.81    | -2.18       | -1.49    | -1.29       | 0.10     |
| Fiber        | 15.47  | 3.50     | 31.28       | 1.89     | 17.31       | -11.95   | 15.39       | 1.69     | -9.23       | -6.49    |
| Ash          | 5.49   | 33.88    | 2.19        | 22.16    | 2.53        | 15.05    | 9.61        | 54.01    | 1.00        | 8.12     |
| Thiamin      | -6.80  | -7.08    | -5.42       | -0.30    | -7.24       | -8.16    | -10.31      | -6.61    | -9.22       | -2.30    |
| Riboflavin   | -14.94 | -6.17    | 7.81        | 16.67    | -2.53       | -9.76    | 6.67        | -3.92    | -9.35       | 1.54     |
| Niacin       | 0.42   | 0.68     | -1.86       | 4.08     | -11.53      | 3.90     | 3.29        | -0.88    | -3.84       | -2.85    |
| Pyridoxine   | -2.99  | -13.79   | -4.48       | -24.53   | -2.86       | -13.51   | -18.29      | -5.80    | -8.08       | -3.90    |
| Folate       | -9.43  | 0.43     | 3.65        | 16.47    | 6.00        | -10.73   | 12.53       | -6.88    | -8.36       | -9.12    |
| P            | 0.22   | 35.94    | -1.18       | -0.12    | -0.35       | 0.16     | -1.21       | -1.14    | -0.66       | -0.79    |
| Zn           | -5.36  | 1.18     | -1.33       | -1.40    | -1.92       | -1.26    | -4.08       | -3.85    | 1.13        | 0.86     |
| Ca           | -7.62  | -3.65    | -5.07       | 1.55     | -0.47       | -2.01    | -2.02       | -3.89    | -10.60      | 0.23     |
| Mg           | -4.06  | -2.54    | -0.52       | 0.57     | -0.62       | -1.57    | -0.89       | -0.06    | -2.48       | -1.15    |
| Fe           | -8.00  | 2.90     | -2.69       | -0.19    | -1.96       | -2.52    | -0.90       | -0.39    | -1.81       | 0.44     |
| Na           | 3.96   | -0.83    | -4.45       | -1.75    | 1.07        | -2.77    | -2.67       | 1.77     | -1.40       | -2.63    |
| K            | -1.05  | 1.13     | 1.02        | -0.06    | -0.13       | -0.33    | -1.10       | -1.67    | 0.28        | 0.73     |

Supplementary Table S7: Effects of parboiling and polishing on the mineral contents of different rice varieties in Bangladesh

| Rice variety           | Ca (mg/100g)                 | Mg (mg/100g)                | Fe (mg/100g)                | Zn (mg/100g)                | Na (mg/100g)                | K (mg/100g)                  | P (mg/100g)                   |
|------------------------|------------------------------|-----------------------------|-----------------------------|-----------------------------|-----------------------------|------------------------------|-------------------------------|
| <b>BR11</b>            |                              |                             |                             |                             |                             |                              |                               |
| Unparboiled unpolished | 40.360 ± 0.761 <sup>a</sup>  | 41.014 ± 0.313 <sup>a</sup> | 0.633 ± 0.028 <sup>a</sup>  | 2.134 ± 0.007 <sup>a</sup>  | 5.077 ± 0.044 <sup>a</sup>  | 108.422 ± 1.218 <sup>a</sup> | 297.337 ± 2.043 <sup>a</sup>  |
| Unparboiled polished   | 39.884 ± 0.602 <sup>ab</sup> | 31.770 ± 0.369 <sup>c</sup> | 0.587 ± 0.014 <sup>b</sup>  | 1.916 ± 0.005 <sup>d</sup>  | 5.278 ± 0.268 <sup>a</sup>  | 107.286 ± 0.783 <sup>a</sup> | 113.600 ± 1.442 <sup>c</sup>  |
| Parboiled unpolished   | 37.283 ± 0.650 <sup>c</sup>  | 39.348 ± 0.734 <sup>b</sup> | 0.582 ± 0.008 <sup>b</sup>  | 2.020 ± 0.013 <sup>b</sup>  | 5.233 ± 0.271 <sup>a</sup>  | 106.499 ± 0.782 <sup>a</sup> | 298.033 ± 1.002 <sup>a</sup>  |
| Parboiled polished     | 38.429 ± 0.677 <sup>bc</sup> | 30.964 ± 0.361 <sup>c</sup> | 0.604 ± 0.007 <sup>ab</sup> | 1.939 ± 0.007 <sup>c</sup>  | 5.189 ± 0.070 <sup>a</sup>  | 107.699 ± 2.302 <sup>a</sup> | 154.433 ± 0.896 <sup>b</sup>  |
| <b>BRRI dhan28</b>     |                              |                             |                             |                             |                             |                              |                               |
| Unparboiled unpolished | 37.836 ± 0.285 <sup>a</sup>  | 35.611 ± 0.448 <sup>a</sup> | 0.557 ± 0.022 <sup>a</sup>  | 1.886 ± 0.021 <sup>a</sup>  | 5.415 ± 0.177 <sup>a</sup>  | 114.515 ± 0.484 <sup>a</sup> | 166.567 ± 1.159 <sup>a</sup>  |
| Unparboiled polished   | 36.392 ± 0.170 <sup>bc</sup> | 35.655 ± 0.815 <sup>a</sup> | 0.517 ± 0.003 <sup>b</sup>  | 1.878 ± 0.013 <sup>a</sup>  | 5.194 ± 0.053 <sup>ab</sup> | 112.729 ± 0.544 <sup>b</sup> | 162.433 ± 1.350 <sup>b</sup>  |
| Parboiled unpolished   | 35.916 ± 0.521 <sup>c</sup>  | 35.426 ± 0.262 <sup>a</sup> | 0.542 ± 0.013 <sup>ab</sup> | 1.861 ± 0.032 <sup>a</sup>  | 5.174 ± 0.064 <sup>ab</sup> | 115.695 ± 0.582 <sup>a</sup> | 164.600 ± 1.400 <sup>ab</sup> |
| Parboiled polished     | 36.956 ± 0.261 <sup>b</sup>  | 35.858 ± 1.409 <sup>a</sup> | 0.516 ± 0.004 <sup>b</sup>  | 1.852 ± 0.022 <sup>a</sup>  | 5.104 ± 0.042 <sup>b</sup>  | 112.657 ± 0.493 <sup>b</sup> | 162.233 ± 1.124 <sup>b</sup>  |
| <b>BRRI dhan29</b>     |                              |                             |                             |                             |                             |                              |                               |
| Unparboiled unpolished | 41.317 ± 0.360 <sup>a</sup>  | 37.960 ± 0.435 <sup>a</sup> | 0.545 ± 0.009 <sup>a</sup>  | 1.876 ± 0.010 <sup>a</sup>  | 5.007 ± 0.194 <sup>a</sup>  | 110.947 ± 0.344 <sup>a</sup> | 172.733 ± 0.508 <sup>a</sup>  |
| Unparboiled polished   | 40.556 ± 0.634 <sup>ab</sup> | 36.154 ± 0.509 <sup>b</sup> | 0.530 ± 0.007 <sup>ab</sup> | 1.856 ± 0.011 <sup>ab</sup> | 5.060 ± 0.056 <sup>a</sup>  | 110.696 ± 0.771 <sup>a</sup> | 169.800 ± 0.624 <sup>c</sup>  |
| Parboiled unpolished   | 41.122 ± 0.190 <sup>a</sup>  | 37.724 ± 0.391 <sup>a</sup> | 0.534 ± 0.003 <sup>a</sup>  | 1.840 ± 0.024 <sup>ab</sup> | 5.191 ± 0.059 <sup>a</sup>  | 110.804 ± 0.539 <sup>a</sup> | 172.133 ± 1.159 <sup>ab</sup> |
| Parboiled polished     | 39.740 ± 0.483 <sup>b</sup>  | 35.588 ± 0.497 <sup>b</sup> | 0.516 ± 0.003 <sup>b</sup>  | 1.832 ± 0.011 <sup>b</sup>  | 5.048 ± 0.058 <sup>a</sup>  | 110.336 ± 0.986 <sup>a</sup> | 170.067 ± 1.050 <sup>bc</sup> |
| <b>BRRI dhan49</b>     |                              |                             |                             |                             |                             |                              |                               |
| Unparboiled unpolished | 32.817 ± 0.366 <sup>a</sup>  | 30.960 ± 0.145 <sup>a</sup> | 0.517 ± 0.007 <sup>a</sup>  | 2.044 ± 0.003 <sup>a</sup>  | 5.254 ± 0.161 <sup>a</sup>  | 112.595 ± 2.243 <sup>a</sup> | 211.833 ± 0.702 <sup>b</sup>  |
| Unparboiled polished   | 33.430 ± 1.486 <sup>a</sup>  | 30.919 ± 0.201 <sup>a</sup> | 0.511 ± 0.002 <sup>a</sup>  | 2.052 ± 0.006 <sup>a</sup>  | 5.126 ± 0.025 <sup>a</sup>  | 111.258 ± 1.086 <sup>a</sup> | 211.133 ± 0.862 <sup>b</sup>  |
| Parboiled unpolished   | 32.153 ± 0.343 <sup>a</sup>  | 30.685 ± 0.205 <sup>a</sup> | 0.512 ± 0.010 <sup>a</sup>  | 1.961 ± 0.033 <sup>b</sup>  | 5.114 ± 0.122 <sup>a</sup>  | 111.358 ± 1.498 <sup>a</sup> | 209.267 ± 0.603 <sup>a</sup>  |
| Parboiled polished     | 32.128 ± 0.806 <sup>a</sup>  | 30.900 ± 0.202 <sup>a</sup> | 0.509 ± 0.007 <sup>a</sup>  | 1.973 ± 0.021 <sup>b</sup>  | 5.216 ± 0.201 <sup>a</sup>  | 109.404 ± 0.674 <sup>a</sup> | 208.733 ± 0.569 <sup>a</sup>  |
| <b>BRRI dhan84</b>     |                              |                             |                             |                             |                             |                              |                               |
| Unparboiled unpolished | 44.720 ± 0.800 <sup>a</sup>  | 60.333 ± 0.937 <sup>a</sup> | 0.702 ± 0.004 <sup>a</sup>  | 2.761 ± 0.014 <sup>b</sup>  | 5.215 ± 0.100 <sup>a</sup>  | 111.299 ± 0.226 <sup>a</sup> | 279.867 ± 1.002 <sup>a</sup>  |
| Unparboiled polished   | 34.683 ± 0.305 <sup>c</sup>  | 51.287 ± 0.258 <sup>b</sup> | 0.676 ± 0.022 <sup>a</sup>  | 2.670 ± 0.009 <sup>c</sup>  | 5.355 ± 0.262 <sup>a</sup>  | 111.174 ± 0.345 <sup>a</sup> | 268.933 ± 0.862 <sup>b</sup>  |
| Parboiled unpolished   | 39.978 ± 0.133 <sup>b</sup>  | 58.839 ± 0.211 <sup>a</sup> | 0.689 ± 0.010 <sup>a</sup>  | 2.792 ± 0.006 <sup>a</sup>  | 5.142 ± 0.023 <sup>a</sup>  | 111.606 ± 0.475 <sup>a</sup> | 278.033 ± 1.626 <sup>a</sup>  |
| Parboiled polished     | 34.762 ± 0.919 <sup>c</sup>  | 50.696 ± 0.885 <sup>b</sup> | 0.679 ± 0.009 <sup>a</sup>  | 2.693 ± 0.004 <sup>c</sup>  | 5.214 ± 0.216 <sup>a</sup>  | 111.991 ± 1.045 <sup>a</sup> | 266.800 ± 2.615 <sup>b</sup>  |

Values are presented as mean ± standard deviation of triplicate analyses, and values with the same superscript letter within the column do not differ significantly at  $p < 0.05$  by one-way ANOVA

Supplementary Table S8: Effects of parboiling and polishing on the B vitamin contents of different rice varieties in Bangladesh

| Rice varieties         | Thiamin<br>(mg/100g)       | Riboflavin<br>(mg/100g)     | Niacin<br>(mg/100g)        | Pyridoxine<br>(mg/100g)     | Folate<br>(mcg/100g)        |
|------------------------|----------------------------|-----------------------------|----------------------------|-----------------------------|-----------------------------|
| <b>BR11</b>            |                            |                             |                            |                             |                             |
| Unparboiled unpolished | 0.152 ± 0.003 <sup>a</sup> | 0.029 ± 0.001 <sup>a</sup>  | 3.153 ± 0.040 <sup>a</sup> | 0.223 ± 0.006 <sup>a</sup>  | 11.240 ± 0.070 <sup>a</sup> |
| Unparboiled polished   | 0.141 ± 0.002 <sup>b</sup> | 0.027 ± 0.003 <sup>a</sup>  | 2.923 ± 0.012 <sup>b</sup> | 0.193 ± 0.016 <sup>bc</sup> | 9.363 ± 0.166 <sup>c</sup>  |
| Parboiled unpolished   | 0.142 ± 0.002 <sup>b</sup> | 0.025 ± 0.002 <sup>a</sup>  | 3.167 ± 0.045 <sup>a</sup> | 0.217 ± 0.012 <sup>ab</sup> | 10.180 ± 0.121 <sup>b</sup> |
| Parboiled polished     | 0.131 ± 0.002 <sup>c</sup> | 0.025 ± 0.002 <sup>a</sup>  | 2.943 ± 0.042 <sup>b</sup> | 0.167 ± 0.006 <sup>c</sup>  | 9.403 ± 0.127 <sup>c</sup>  |
| <b>BRRI dhan28</b>     |                            |                             |                            |                             |                             |
| Unparboiled unpolished | 0.141 ± 0.001 <sup>a</sup> | 0.021 ± 0.001 <sup>a</sup>  | 3.947 ± 0.035 <sup>a</sup> | 0.223 ± 0.012 <sup>a</sup>  | 12.150 ± 0.434 <sup>a</sup> |
| Unparboiled polished   | 0.111 ± 0.001 <sup>c</sup> | 0.012 ± 0.001 <sup>b</sup>  | 2.943 ± 0.032 <sup>c</sup> | 0.177 ± 0.015 <sup>b</sup>  | 5.403 ± 0.234 <sup>b</sup>  |
| Parboiled unpolished   | 0.134 ± 0.004 <sup>b</sup> | 0.023 ± 0.002 <sup>a</sup>  | 3.873 ± 0.015 <sup>a</sup> | 0.213 ± 0.006 <sup>a</sup>  | 12.593 ± 0.559 <sup>a</sup> |
| Parboiled polished     | 0.111 ± 0.001 <sup>c</sup> | 0.014 ± 0.001 <sup>b</sup>  | 3.063 ± 0.031 <sup>b</sup> | 0.133 ± 0.006 <sup>c</sup>  | 6.293 ± 0.152 <sup>b</sup>  |
| <b>BRRI dhan29</b>     |                            |                             |                            |                             |                             |
| Unparboiled unpolished | 0.152 ± 0.003 <sup>a</sup> | 0.026 ± 0.003 <sup>a</sup>  | 3.670 ± 0.040 <sup>a</sup> | 0.233 ± 0.015 <sup>a</sup>  | 10.337 ± 0.375 <sup>a</sup> |
| Unparboiled polished   | 0.143 ± 0.004 <sup>b</sup> | 0.027 ± 0.003 <sup>a</sup>  | 2.823 ± 0.015 <sup>d</sup> | 0.123 ± 0.012 <sup>b</sup>  | 7.210 ± 0.100 <sup>b</sup>  |
| Parboiled unpolished   | 0.141 ± 0.001 <sup>b</sup> | 0.026 ± 0.001 <sup>a</sup>  | 3.247 ± 0.038 <sup>b</sup> | 0.227 ± 0.006 <sup>a</sup>  | 10.957 ± 0.276 <sup>a</sup> |
| Parboiled polished     | 0.131 ± 0.001 <sup>c</sup> | 0.025 ± 0.001 <sup>a</sup>  | 2.933 ± 0.006 <sup>c</sup> | 0.107 ± 0.006 <sup>b</sup>  | 6.437 ± 0.393 <sup>b</sup>  |
| <b>BRRI dhan49</b>     |                            |                             |                            |                             |                             |
| Unparboiled unpolished | 0.257 ± 0.008 <sup>a</sup> | 0.046 ± 0.002 <sup>a</sup>  | 6.420 ± 0.184 <sup>a</sup> | 0.273 ± 0.006 <sup>a</sup>  | 15.267 ± 0.148 <sup>b</sup> |
| Unparboiled polished   | 0.218 ± 0.005 <sup>c</sup> | 0.043 ± 0.002 <sup>a</sup>  | 5.737 ± 0.038 <sup>c</sup> | 0.230 ± 0.001 <sup>b</sup>  | 15.207 ± 0.096 <sup>b</sup> |
| Parboiled unpolished   | 0.233 ± 0.003 <sup>b</sup> | 0.042 ± 0.002 <sup>a</sup>  | 6.173 ± 0.076 <sup>b</sup> | 0.223 ± 0.006 <sup>b</sup>  | 17.180 ± 0.061 <sup>a</sup> |
| Parboiled polished     | 0.213 ± 0.003 <sup>d</sup> | 0.044 ± 0.001 <sup>a</sup>  | 5.573 ± 0.040 <sup>c</sup> | 0.217 ± 0.012 <sup>b</sup>  | 14.160 ± 0.036 <sup>c</sup> |
| <b>BRRI dhan84</b>     |                            |                             |                            |                             |                             |
| Unparboiled unpolished | 0.181 ± 0.001 <sup>a</sup> | 0.035 ± 0.004 <sup>ab</sup> | 4.250 ± 0.040 <sup>a</sup> | 0.330 ± 0.010 <sup>a</sup>  | 23.953 ± 0.465 <sup>a</sup> |
| Unparboiled polished   | 0.151 ± 0.002 <sup>c</sup> | 0.034 ± 0.003 <sup>ab</sup> | 4.153 ± 0.035 <sup>b</sup> | 0.257 ± 0.100 <sup>c</sup>  | 21.210 ± 0.199 <sup>b</sup> |
| Parboiled unpolished   | 0.162 ± 0.002 <sup>b</sup> | 0.037 ± 0.004 <sup>a</sup>  | 4.390 ± 0.020 <sup>a</sup> | 0.303 ± 0.012 <sup>b</sup>  | 21.950 ± 0.276 <sup>b</sup> |
| Parboiled polished     | 0.141 ± 0.002 <sup>c</sup> | 0.033 ± 0.003 <sup>b</sup>  | 4.117 ± 0.031 <sup>b</sup> | 0.247 ± 0.006 <sup>c</sup>  | 19.277 ± 0.117 <sup>c</sup> |

Values are presented as mean ± standard deviation of triplicate analyses, and values with the same superscript letter within the column do not differ significantly at  $p < 0.05$  by one-way ANOVA

Supplementary Table S9: Percent contribution to RDA of B vitamins and minerals by the daily intake of different varieties of unparboiled unpolished, unparboiled polished, parboiled unpolished, and parboiled polished rice

| Rice varieties         | Thiamin | Riboflavin | Niacin | Pyridoxine | Folate | Ca    | Mg    | Fe    | Zn    |
|------------------------|---------|------------|--------|------------|--------|-------|-------|-------|-------|
| <b>BR11</b>            |         |            |        |            |        |       |       |       |       |
| Unparboiled unpolished | 32.93   | 4.52       | 68.32  | 36.29      | 14.61  | 15.74 | 36.35 | 12.99 | 48.96 |
| Unparboiled polished   | 30.62   | 4.21       | 63.34  | 31.41      | 12.17  | 15.55 | 28.16 | 12.05 | 43.96 |
| Parboiled unpolished   | 30.69   | 3.85       | 68.61  | 35.21      | 13.23  | 14.54 | 34.88 | 11.95 | 46.33 |
| Parboiled polished     | 28.45   | 3.95       | 63.77  | 27.08      | 12.22  | 14.99 | 27.45 | 12.4  | 44.48 |
| <b>BRRI dhan28</b>     |         |            |        |            |        |       |       |       |       |
| Unparboiled unpolished | 30.6    | 3.3        | 85.5   | 36.3       | 15.8   | 14.8  | 31.6  | 11.4  | 43.3  |
| Unparboiled polished   | 24.1    | 1.9        | 63.8   | 28.7       | 7      | 14.2  | 31.6  | 10.6  | 43.1  |
| Parboiled unpolished   | 29      | 3.6        | 83.9   | 34.7       | 16.4   | 14    | 31.4  | 11.1  | 42.7  |
| Parboiled polished     | 24.1    | 2.2        | 66.4   | 21.7       | 8.2    | 14.4  | 31.8  | 10.6  | 24.5  |
| <b>BRRI dhan29</b>     |         |            |        |            |        |       |       |       |       |
| Unparboiled unpolished | 32.93   | 4.11       | 79.52  | 37.92      | 13.44  | 16.11 | 33.65 | 11.19 | 43.04 |
| Unparboiled polished   | 30.98   | 4.26       | 61.17  | 20.04      | 9.37   | 15.82 | 32.05 | 10.87 | 42.57 |
| Parboiled unpolished   | 30.55   | 4          | 70.34  | 36.83      | 14.24  | 16.04 | 33.44 | 10.97 | 42.21 |
| Parboiled polished     | 28.46   | 3.85       | 63.56  | 17.33      | 8.37   | 15.5  | 31.54 | 10.6  | 42.04 |
| <b>BRRI dhan49</b>     |         |            |        |            |        |       |       |       |       |
| Unparboiled unpolished | 39.22   | 5.46       | 9.08   | 44.42      | 19.85  | 12.8  | 27.44 | 10.61 | 46.9  |
| Unparboiled polished   | 32.79   | 5.3        | 89.99  | 37.38      | 19.77  | 13.04 | 27.41 | 10.5  | 47.07 |
| Parboiled unpolished   | 35.17   | 5.82       | 95.12  | 36.29      | 22.33  | 12.54 | 27.2  | 10.52 | 44.99 |
| Parboiled polished     | 30.62   | 5.1        | 89.19  | 35.21      | 18.41  | 12.53 | 27.39 | 10.45 | 45.26 |
| <b>BRRI dhan84</b>     |         |            |        |            |        |       |       |       |       |
| Unparboiled unpolished | 55.61   | 7.23       | 139.1  | 53.63      | 31.14  | 17.44 | 53.48 | 14.4  | 63.33 |
| Unparboiled polished   | 47.16   | 6.76       | 124.29 | 41.71      | 27.57  | 13.53 | 45.46 | 13.88 | 61.26 |
| Parboiled unpolished   | 50.48   | 6.55       | 133.76 | 49.29      | 28.54  | 15.59 | 52.15 | 14.14 | 64.05 |
| Parboiled polished     | 46.08   | 6.86       | 120.76 | 40.08      | 25.06  | 13.56 | 44.54 | 13.94 | 61.79 |
